# Supplementary material for: Rate-dependent structure-electrochemistry relationships and origins of capacity fading in P2-type Na2/3Fe2/3Mn1/3O2
Source: Royal Society of Chemistry journal article supplement (doi:10.1039/d4qi02804j), 2025-01-01
Supplement: d4qi02804j1.pdf [file d4qi02804j1.pdf]

## Supplementary Information

### Rate-dependent structure-electrochemistry relationships and origins of capacity fading in P2-type $\text{Na}_{2/3}\text{Fe}_{2/3}\text{Mn}_{1/3}\text{O}_2$

Damian Goonetilleke,<sup>a,†,\*</sup> Begoña Silvan,<sup>b,c,‡</sup> Elena Gonzalo,<sup>b</sup> Montserrat Galceran,<sup>b</sup> Montse Casas-Cabanas,<sup>b,d</sup>  
Maxim Avdeev,<sup>e,f</sup> Francois Fauth,<sup>g</sup> Teófilo Rojo,<sup>b,h</sup> Neeraj Sharma,<sup>a</sup> Damien Saurel<sup>b,\*</sup>

<sup>a</sup> School of Chemistry, UNSW Sydney, Sydney NSW 2052, Australia

<sup>b</sup> Centre for Cooperative Research on Alternative Energies (CIC energiGUNE), Basque Research and  
Technology Alliance (BRTA), Alava Technology Park, Albert Einstein 48, 01510, Vitoria-Gasteiz, Spain

<sup>c</sup> Departamento de Física de la Materia Condensada, Facultad de Ciencia y Tecnología, Universidad del País  
Vasco, UPV/EHU, Apdo 644, 48080 Bilbao, Spain

<sup>d</sup> Ikerbasque Basque Foundation for Science, María Díaz de Haro 3, 48013, Bilbao, Spain

<sup>e</sup> Australian Nuclear Science and Technology Organisation, New Illawarra Road, Lucas Heights, NSW 2234,  
Australia

<sup>f</sup> School of Chemistry, The University of Sydney, Sydney, NSW 2006, Australia

<sup>g</sup> CELLS – ALBA Synchrotron, E-08290 Cerdanyola del Vallès, Barcelona, Spain

<sup>h</sup> Departamento de Química Inorgánica, Universidad del País Vasco UPV/EHU, P.O. Box. 644, 48080, Bilbao,  
Spain

\* Email: [damian.goonetilleke@eu.umicore.com](mailto:damian.goonetilleke@eu.umicore.com), [dsaurel@cicenergigune.com](mailto:dsaurel@cicenergigune.com)

<sup>†</sup> Current Affiliation: Umicore Corporate Research & Development, Watertorenstraat 33, 2250 Olen, Belgium

<sup>‡</sup> Current Affiliation: LiNa Energy Ltd, Unit 1 Sharpes, Mill St, South Rd, Lancaster LA1 4XQ, United Kingdom

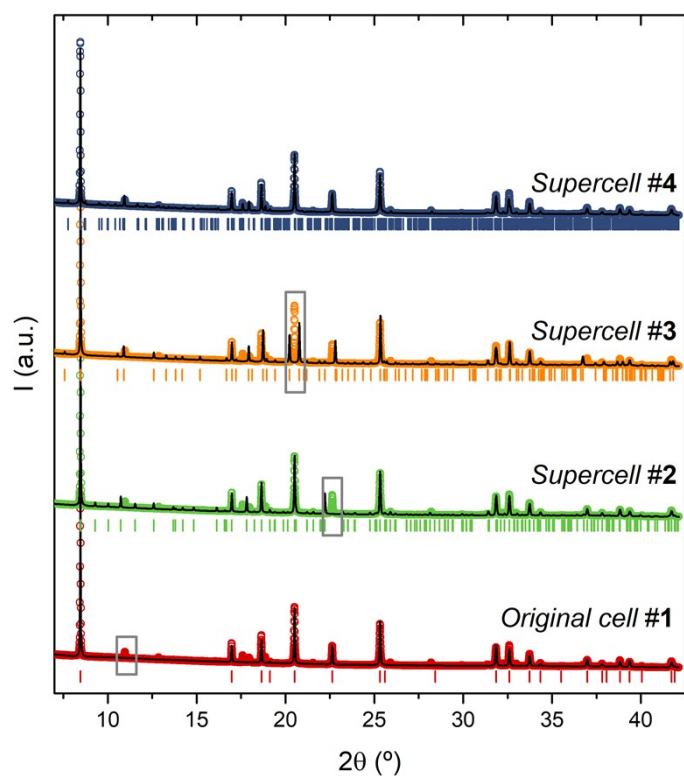

1

2 **Figure S1** Le Bail refinements of P2-NFMO with different superstructures described in **Table S1**. The plane projections of  
 3 these supercells are shown in **Figure S2**. Some of the reflections that are not correctly adjusted have been highlighted  
 4 with grey squares.

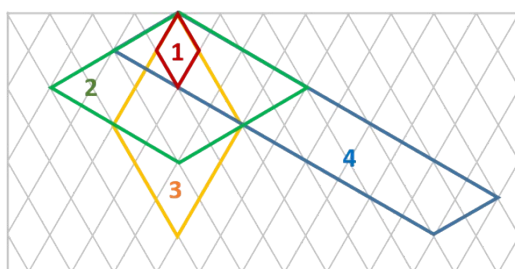

5

6 **Figure S2** In-plane projection of the tested supercells. All the tested structures share the same out-of-plane stacking  
 7 symmetry.

8

**Table S1** Resulting refined parameters for the tested supercell structural models refined against the SXRD pattern of P2-NFMO (**Figure 1a**). All the cells share the same stacking order. The cell 1 is the original P2 structure. Cells 2 and 3 are defined with a hexagonal base (see **Figure S2**), where cell 2 has been taken from the literature,<sup>92</sup> and cell 3 corresponds to three times per side in *a* and *b* directions. The supercell 4 has been chosen using DICVOL software and is defined with a rotated monoclinic space group.

| Cell # | S.G.                      | <i>a</i> / Å                 | <i>b</i> / Å              | <i>c</i> / Å                  | $\alpha$ / ° | $\beta$ / ° | $\gamma$ / ° |
|--------|---------------------------|------------------------------|---------------------------|-------------------------------|--------------|-------------|--------------|
| 1      | <i>P6<sub>3</sub>/mmc</i> | <i>a</i> <sub>0</sub> = 2.94 | <i>a</i> <sub>0</sub>     | <i>c</i> <sub>0</sub> = 11.18 | 90           | 90          | 120          |
| 2      | <i>P6<sub>3</sub>/mmc</i> | 2√3 <i>a</i> <sub>0</sub>    | 2√3 <i>a</i> <sub>0</sub> | <i>c</i> <sub>0</sub>         | 90           | 90          | 120          |
| 3      | <i>P6<sub>3</sub>/mmc</i> | 3 <i>a</i> <sub>0</sub>      | 3 <i>a</i> <sub>0</sub>   | <i>c</i> <sub>0</sub>         | 90           | 90          | 120          |
| 4      | <i>Pm</i>                 | 5√3 <i>a</i> <sub>0</sub>    | <i>c</i> <sub>0</sub>     | √3 <i>a</i> <sub>0</sub>      | 90           | 120         | 90           |

6

## 7 Magnetic measurements

8 The inverse susceptibility measurements are presented in **Figure S3**, and the magnetization versus DC  
9 magnetic field at 2.5 K is shown as an inset. A linear behaviour of the inverse susceptibility is observed in the  
10 range 180 - 300 K, in agreement with the Curie-Weiss law:

$$11 \quad \chi^{-1} = \frac{T + \theta}{C} \quad (1)$$

12 where  $\theta$  is the Weiss constant and *C* is the Curie constant, which is defined as:

$$13 \quad C = \frac{N_A \mu_{eff}^2 \mu_B^2}{3k_B} \quad (2)$$

14 where *N<sub>A</sub>* is the Avogadro's number,  $\mu_{eff}$  the effective moment,  $\mu_B$  the Bohr's magneton and *k<sub>B</sub>* the  
15 Boltzmann's constant. The effective moment  $\mu_{eff}$  and Weiss temperature  $\theta$  deduced from the fit of the inverse  
16 susceptibility presented in **Figure S3** using **Equation 2** is shown in **Table S2**. P2-NFMFO exhibits an effective  
17 magnetic moment near room temperature of about 5.11, which is close to the theoretical value of 5.32 when  
18 high spin (HS) Fe<sup>III</sup> (*S* = 2.5) and HS Mn<sup>IV</sup> (*S* = 1.5) are considered assuming the Landé factor *g* = 2:

$$19 \quad \mu_{eff} = g\sqrt{S(S+1)} \quad (3)$$

$$20 \quad \mu_{eff}^{NMFO} = \sqrt{\frac{2}{3}(\mu_{eff}^{Fe(III)})^2 + \frac{1}{3}(\mu_{eff}^{Mn(IV)})^2} \quad (4)$$

21 Moreover, the negative root of the linear fits with Equation 1 near room temperature, corresponding to a  
22 large negative Weiss constant  $\theta$  = -130 K which indicates strong antiferromagnetic coupling. The non-linear

behaviour below  $\approx 150$  K can be attributed to increasing local magnetic correlations and competing  $\text{Mn}^{\text{IV}}$ - $\text{Fe}^{\text{III}}$  ferro- and  $\text{Fe}^{\text{III}}$ - $\text{Fe}^{\text{III}}$ -antiferromagnetic interactions.<sup>93</sup>

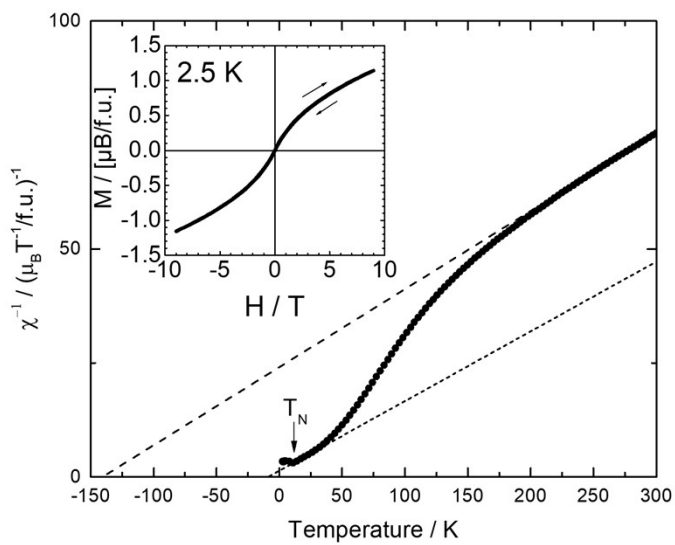

**Figure S3** Inverse susceptibility of the P2-NFMO material, together with the linear fit using Equation 1 in the range 200-300 K. Inset: Magnetization versus DC magnetic field at 2.5 K.

**Table S2** Effective moment  $\mu_{\text{eff}}$  and Weiss temperature  $\theta$  deduced from the linear fit of the inverse susceptibility measurement (**Figure S3**) near room temperature (high temperature) and near Néel temperature (low temperature).

| $\mu_{\text{eff}}$ | $\theta / \text{K}$ | $T_N / \text{K}$ |
|--------------------|---------------------|------------------|
| $5.107 \pm 0.007$  | $-141 \pm 2$        | 8.1              |

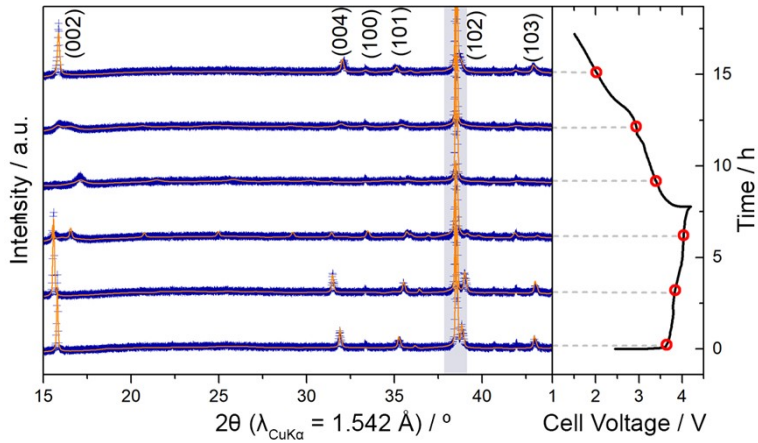

**Figure S4** Selected Le Bail refinements of low-rate operando XRD data collected from P2.

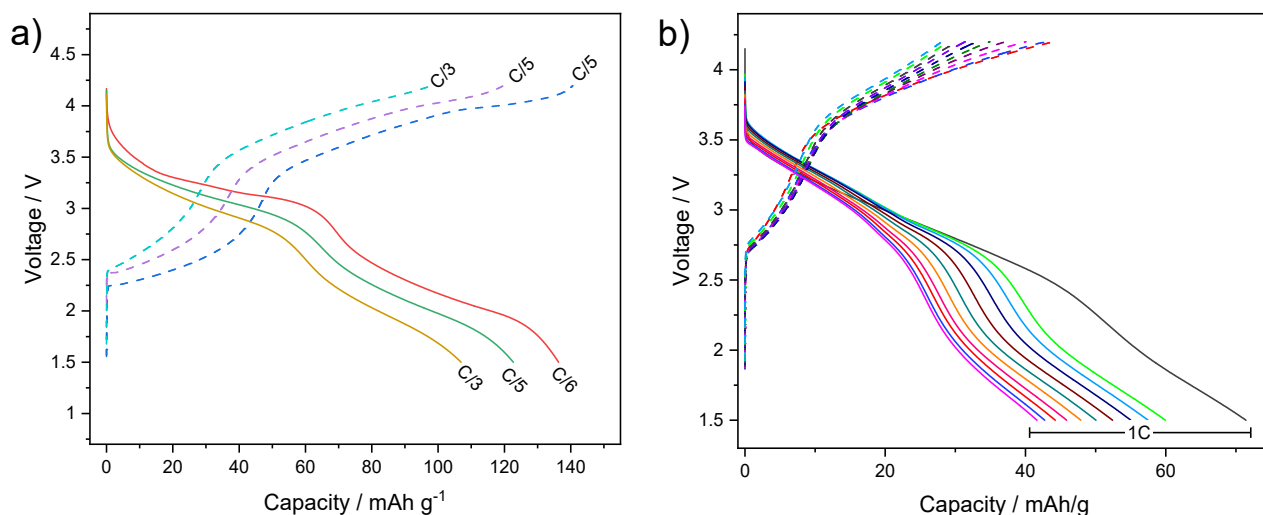

1  
2 **Figure S5** Voltage versus capacity curves delivered by the P2-type cell during *operando* cycling at a) moderate and b) high  
3 current densities.

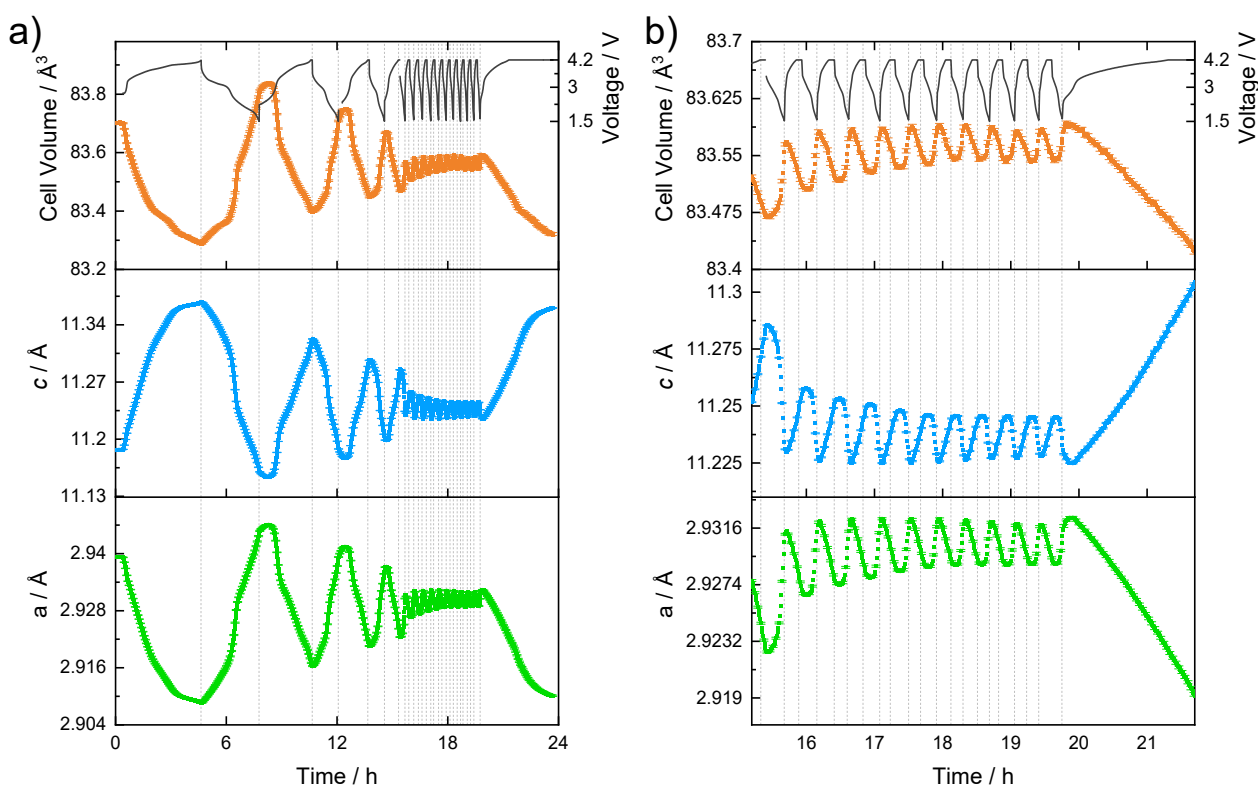

4  
5 **Figure S6** Refined lattice parameters of P2-NFMO determined from SXRD data collected during the high-rate *operando*  
6 SXRD cycling experiment at a) moderate and b) high current densities.

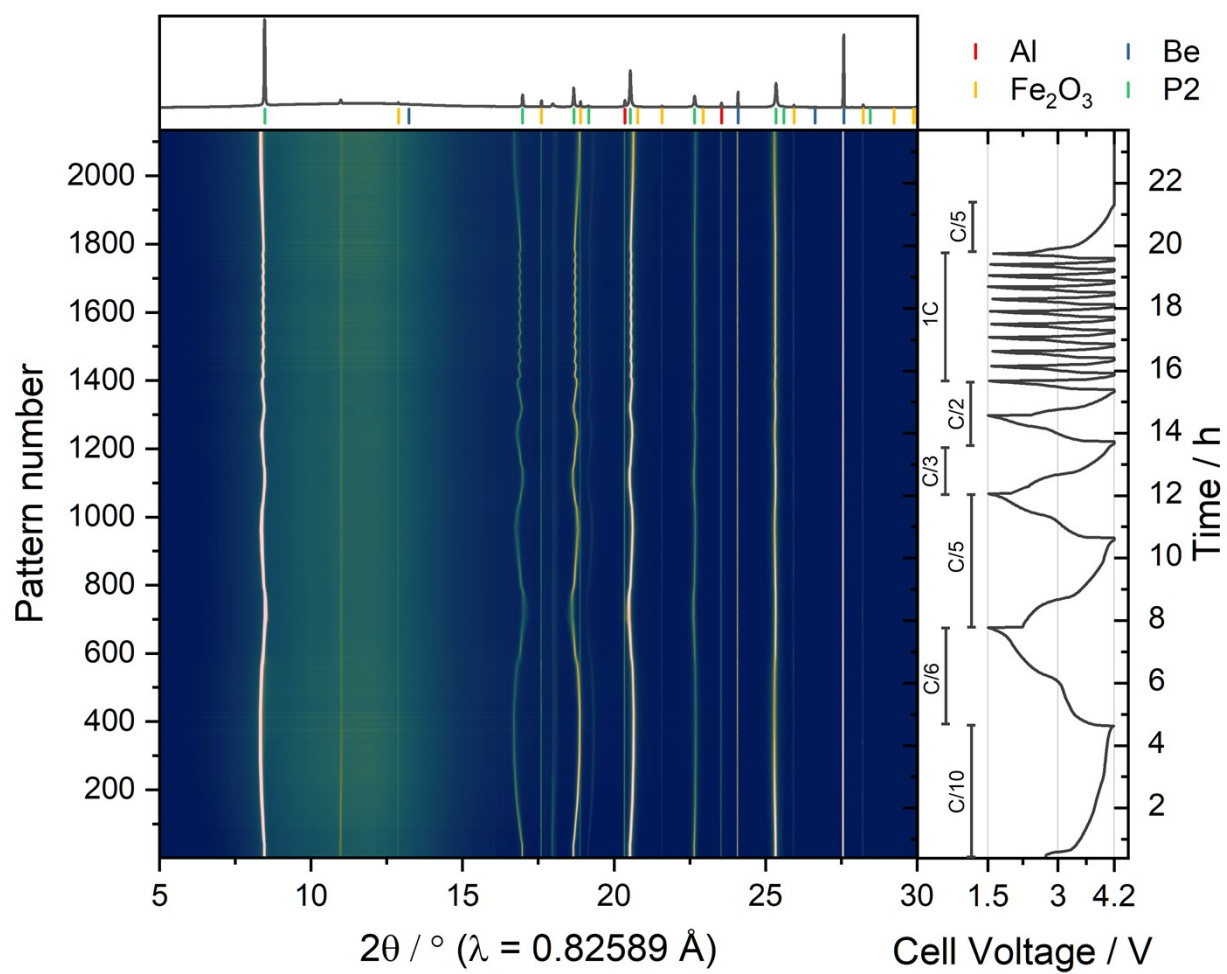

1  
2 **Figure S7** Operando SXR D data collected during cycling of the P2-NFMO containing cell.  
3

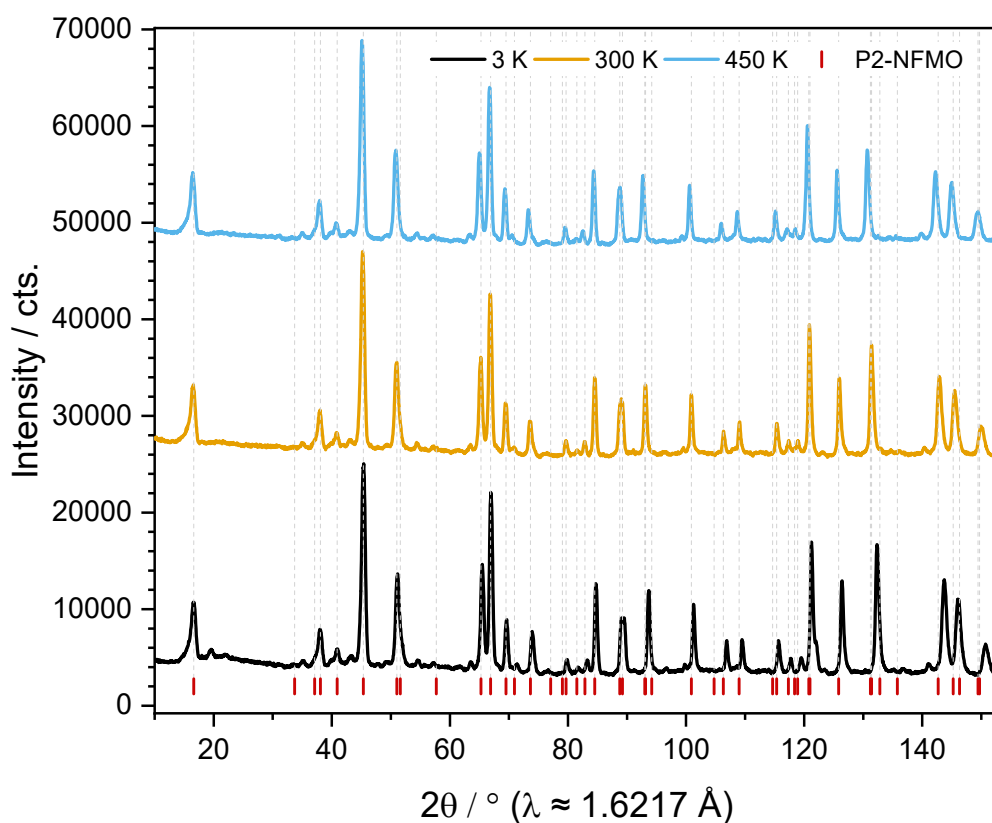

1  
2 **Figure S8** Neutron diffraction patterns collected from P2-NFMO at various temperatures.  
3 **Table S3** Refined structural parameters of P2-NFMO determined from neutron diffraction patterns shown in **Figure S7**,  
4 collected at various temperatures.

| Temperature / K | $a$ / Å     | $c$ / Å      | Vol / Å <sup>3</sup> | $z_o$       | Na(1) SOF | Na(2) SOF |
|-----------------|-------------|--------------|----------------------|-------------|-----------|-----------|
| 3               | 2.93871(12) | 11.12758(41) | 83.223(6)            | 0.09358(16) | 0.133(9)  | 0.534(9)  |
| 300             | 2.94318(9)  | 11.18267(25) | 83.890(4)            | 0.09289(10) | 0.136(7)  | 0.552(8)  |
| 450             | 2.94761(14) | 11.22524(49) | 84.463(7)            | 0.09296(17) | 0.117(9)  | 0.550(9)  |

5
